# Supplementary material for: Homogeneous and efficient production of a bacterial nanocellulose-lactoferrin-collagen composite under an electric field as a matrix to promote wound healing
Source: Royal Society of Chemistry journal article supplement (doi:10.1039/d0bm01553a), 2020-11-27
Supplement: d0bm01553a1.pdf [file d0bm01553a1.pdf]

# Homogeneous and Efficient Production of a Bacterial Nanocellulose-Lactoferrin-Collagen Composite under an Electric Field as a Matrix to Promote Wound Healing

Haibin Yuan,<sup>a,b,c</sup> Lin Chen<sup>b</sup> and Feng F. Hong<sup>\*a,b,c</sup>

<sup>a</sup> Scientific Research Base of Bacterial Nanofiber Manufacturing and Composite Technology, China Textile Engineering Society, Shanghai 201620, China. E-mail: fhong@dhu.edu.cn

<sup>b</sup> Group of Microbiological Engineering and Industrial Biotechnology, College of Chemistry, Chemical Engineering and Biotechnology, Donghua University, North Ren Min Road 2999, Shanghai 201620, China.

<sup>c</sup> Key Lab of Science & Technology of Eco-textile, Ministry of Education, Donghua University, North Ren Min Road 2999, Shanghai 201620, China.

## S1 ATR-FTIR spectroscopy

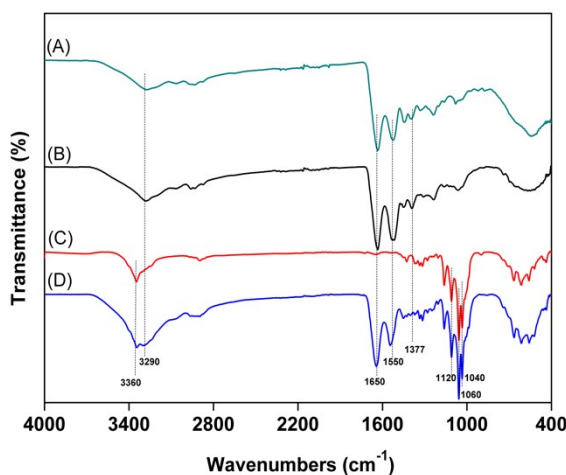

**Fig. S1** FTIR spectra of (A) LF, (B) COL, (C) BNC and (D) BNC/LF/COL composite obtained by electrophoresis.

## **S2 HIGHLIGHTS**

1. A novel green technology based on electrophoresis was developed to synthesize BNC based composites.
2. The technology showed superior advantages with general applicability over the traditional immersion-adsorption methods.
3. A bacterial nanocellulose-lactoferrin-collagen composite was fabricated using the electrophoresis.
4. The BNC composite exhibited strong antibacterial activity and good cytocompatibility.
5. The BNC composite exhibited a greater therapeutic effect in a rat model of wound healing.
